# Supplementary material
Source: MDPI journal article supplement (https://www.mdpi.com/1999-4907/9/4/216)
Supplement: s1 [file s1]

Archive with 2 entries (2 files):
- forests-292497-Figure S1.pdf
- S2_Spatio_temporal_dynamics_11.04.2018.zip
